# Supplementary material
Source: PubMed Central journal article supplement (PMC4524569)

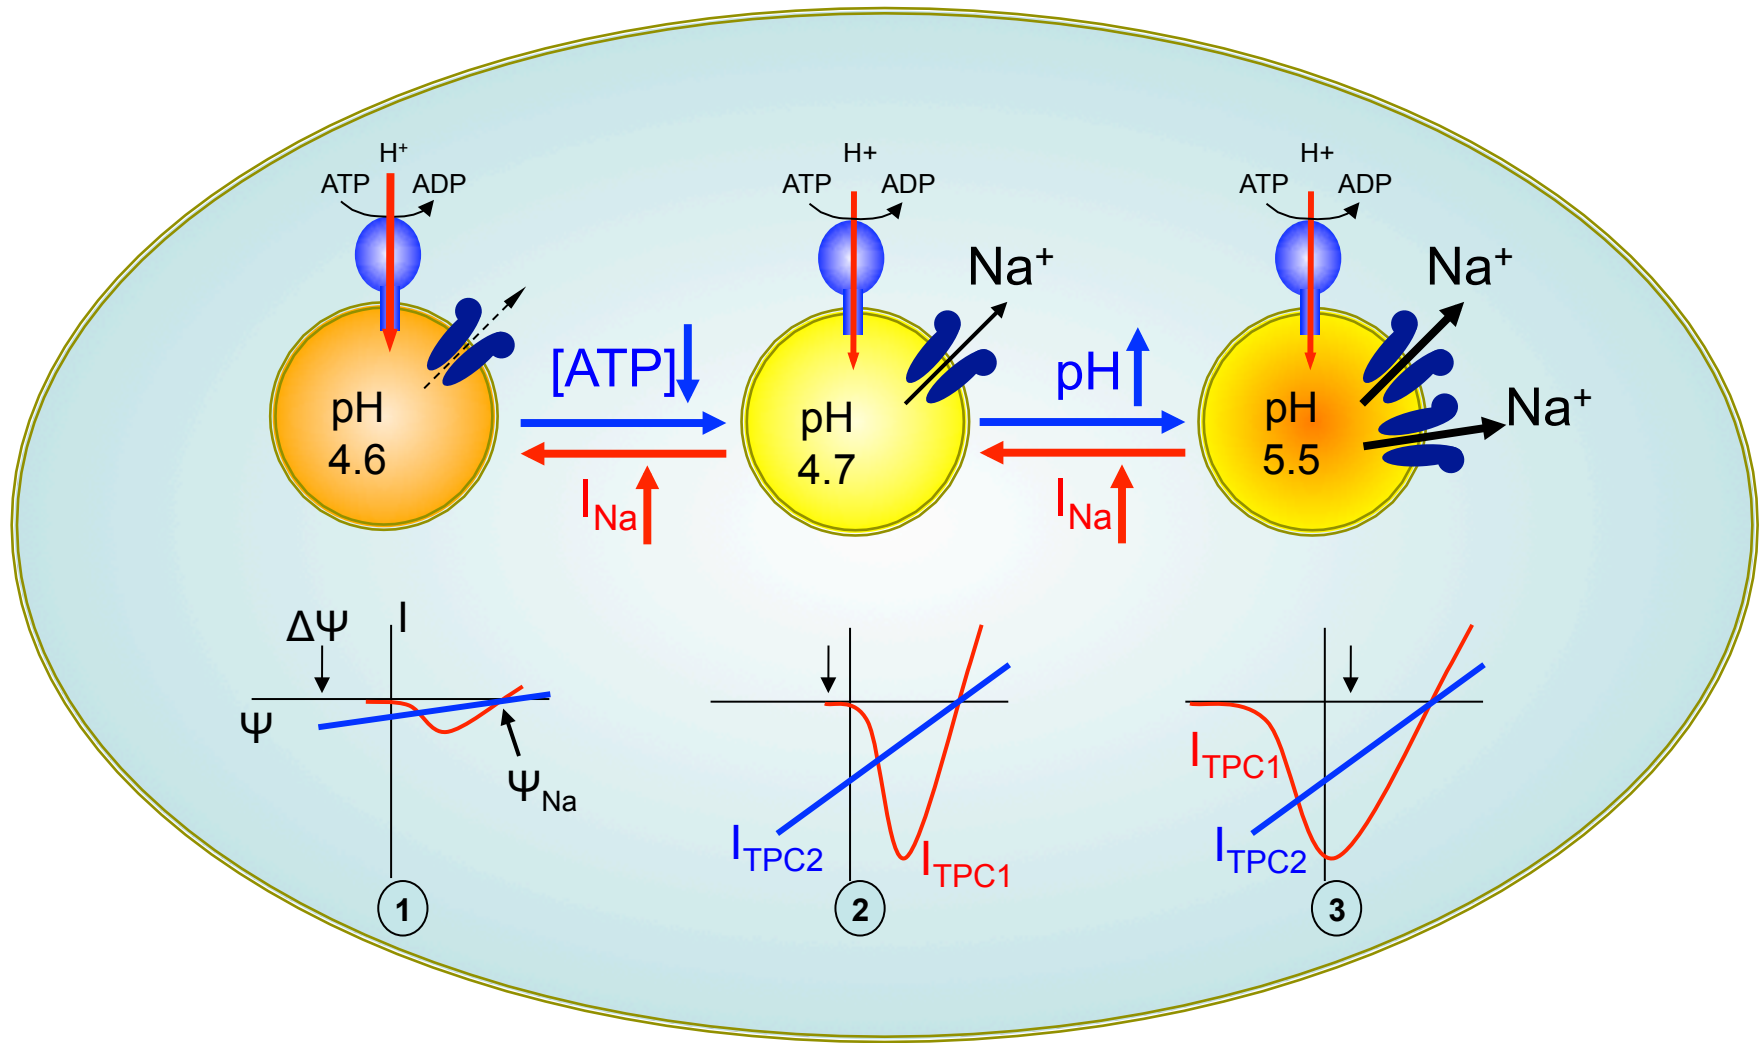

Supplement: NIHMS709157-supplement-Fig__3.pdf [file NIHMS709157-supplement-Fig__3.pdf]
